# Supplementary material for: An etching based fluorescent probe for sensitive detection of hydrogen sulfide in cells
Source: Royal Society of Chemistry journal article supplement (doi:10.1039/c7an01394a), 2017-01-01
Supplement: c7an01394a1.pdf [file c7an01394a1.pdf]

## **Electronic Supplementary Information**

### **Etching Based Fluorescent Probe for Sensitive Detection of Hydrogen Sulfide in Cells**

#### **Contents**

- 1. UV-vis absorbance spectrum of AgNPs. (Figure S1)**
- 2. The effect of pH to the stability and detection efficiency of FAM-DNA/AgNPs (Figure S2)**
- 3. Cell viability of Hela cells (Figure S3)**

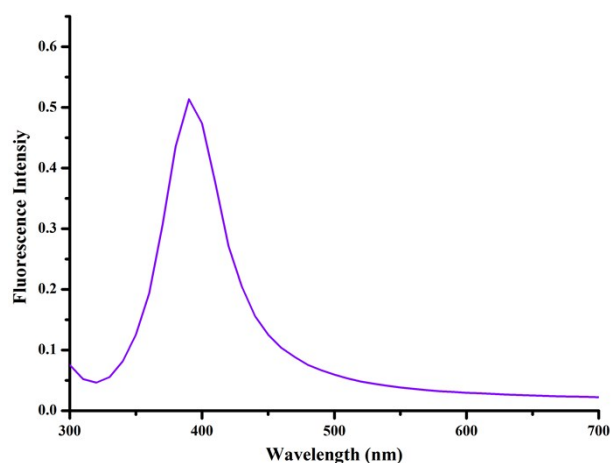

**Figure S1.** UV - Visible spectra of AgNPs

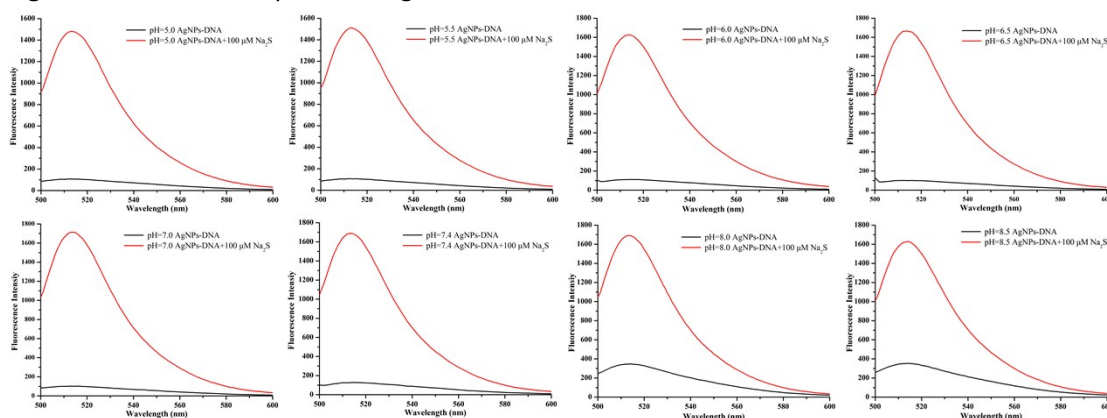

**Figure S2.** Fluorescence spectra ( $\lambda_{\text{exc}} = 480 \text{ nm}$ ) of FAM-DNA/AgNPs with and without  $\text{Na}_2\text{S}$  ( $100 \mu\text{M}$ ) at different pH conditions.

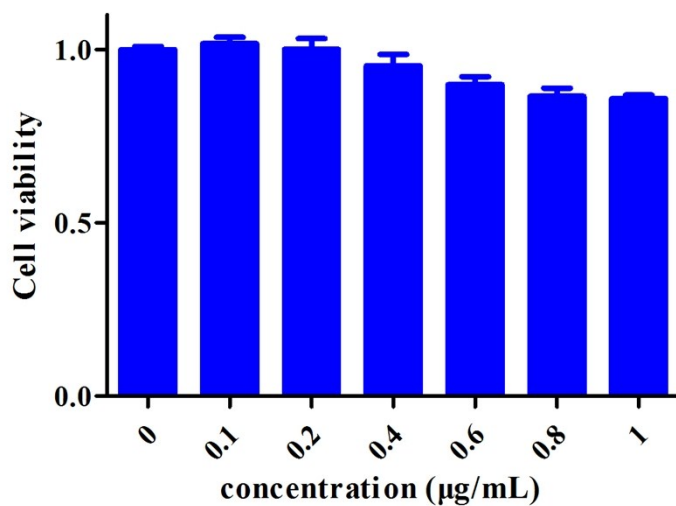

**Figure S3.** The cell viability of Hela cells after 48 h incubation with different concentrations of FAM-DNA/AgNPs.
